# Supplementary material for: Three types of scientific evidence to inform physical activity policy: results from a comparative scoping review
Source: PubMed Central journal article supplement (PMC4947117; doi:10.1007/s00038-016-0807-y), 2016-04-26
Supplement: 38_2016_807_MOESM1_ESM.pdf [file 38_2016_807_MOESM1_ESM.pdf]

## Three types of scientific evidence to inform physical activity policy: Results from a comparative scoping review

Alfred Rütten,<sup>1</sup> Diana Schow, João Breda, Gauden Galea, Sonja Kahlmeier, Jean-Michel Oppert, Hidde van der Ploeg, Willem van Mechelen

### Additional File 1: Supplementary tables and figures

*Additional Table 1* Kinds of reviews identified per each type of evidence: type I health, type II intervention, type III policy

| Review Types                   | Type I |      | Type II |      | Type III |     |
|--------------------------------|--------|------|---------|------|----------|-----|
|                                | Number | %    | Number  | %    | Number   | %   |
| Review (not systematic)        | 451    | 52.7 | 108     | 30.9 | 24       | 60  |
| Systematic Review              | 266    | 31.1 | 157     | 44.8 | 6        | 15  |
| Meta Analysis                  | 68     | 7.9  | 42      | 12.0 | 2        | 5   |
| Review of Review               | 18     | 2.1  | 21      | 6.0  | 2        | 5   |
| Narrative Review               | 11     | 1.3  | 4       | 1.1  | 0        | .0  |
| Synthesis – Integrative Review | 8      | 0.9  | 11      | 3.1  | 1        | 2.5 |
| Scoping Review                 | 5      | 0.6  | 0       | .0   | 2        | 5.0 |
| Document Review                | 5      | 0.6  | 0       | .0   | 0        | .0  |
| Bibliography Review            | 3      | 0.4  | 0       | .0   | 0        | .0  |
| Rapid Review                   | 2      | 0.2  | 0       | .0   | 0        | .0  |
| Umbrella Review                | 1      | 0.1  | 0       | .0   | 0        | .0  |
| Qualitative Review             | 1      | 0.1  | 0       | .0   | 0        | .0  |
| Other                          | 17     | 2.0  | 7       | 2.0  | 3        | 7.5 |

As shown in Additional Table 1, systematic reviews and meta-analyses are most prominent regarding Type II evidence (more than 50%) and represent almost 40% of selected reviews of Type I evidence. In contrast, these approaches only represent 20% of the Type III reviews. Review types were marked “other” if the title and abstract did not provide sufficient information to determine the category.

<sup>1</sup> Corresponding author: Alfred Rütten, Friedrich Alexander University, Institute of Sport Science and Sport, Erlangen, Germany; e-mail: alfred.ruetten@fau.de; phone: +49 (0) 9131.85.25.000; fax +49 (0) 9131.85.25.002

*Additional Figure 1 Classifications of type II (intervention) reviews based on settings*

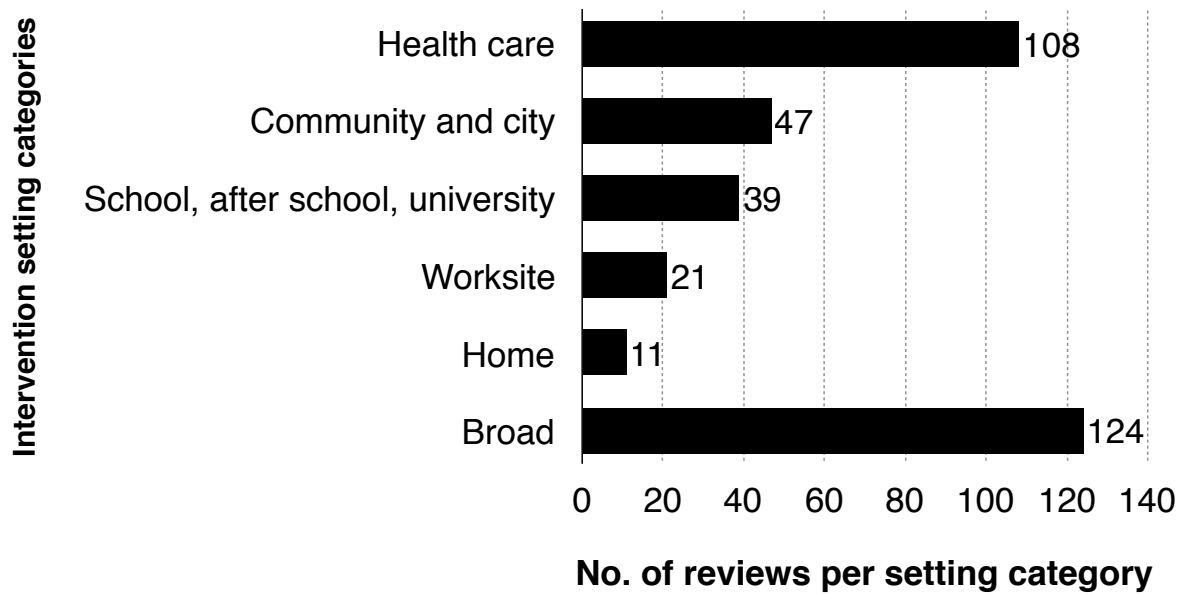

As shown in Additional Figure 1, the most prevalent setting in Type II was health care (31%). This was followed by community and city (13%), school, after school (i.e. the after school period during the day), university (11%), worksite (6%) and home (3%), respectively. Thirty-five percent of reviews were categorized as broad if they addressed multiple settings or were not focused on settings.

*Additional Figure 2 Classifications of type II (intervention) reviews based on intervention types*

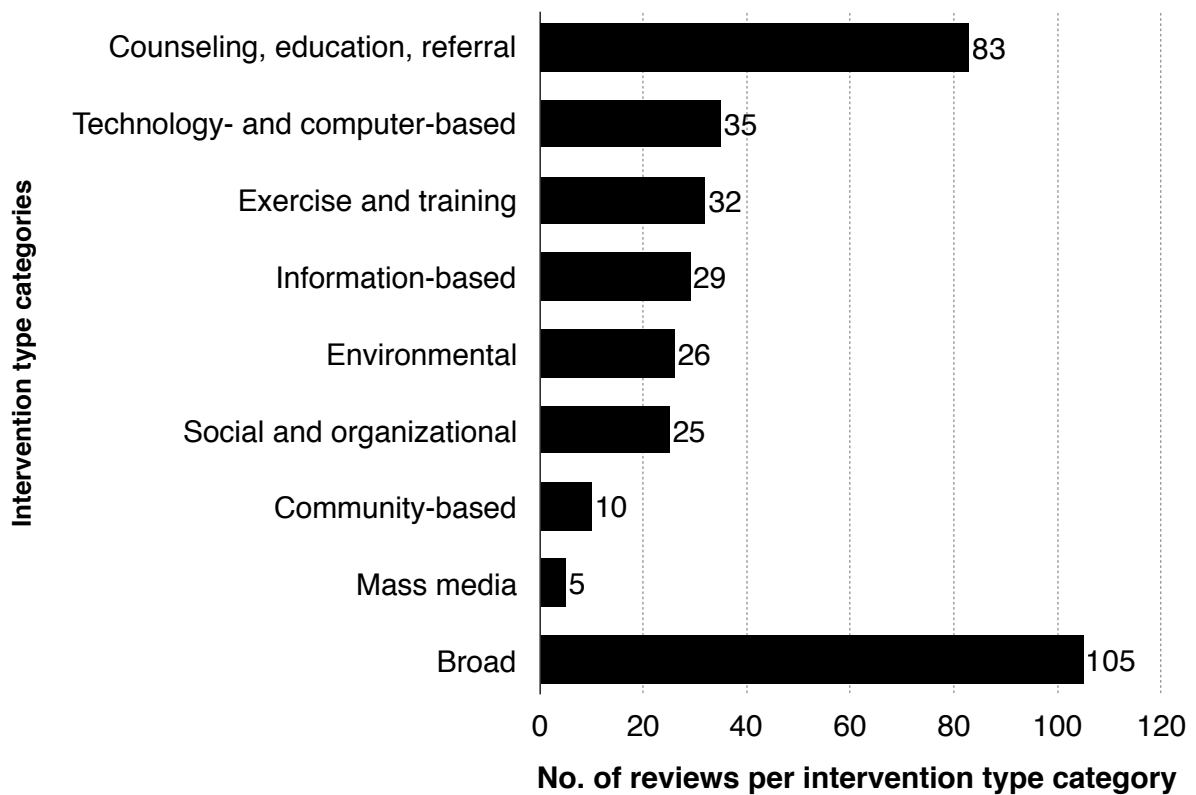

As illustrated in Additional Figure 2, the most prevalent intervention type in Type II reviews was counseling/education/referral (24%). This was followed by technology and computer-based (10%), exercise and training (9%), information-based (8%), environmental (7%), social and organizational (7%), community-based (3%) and mass media (1%). Thirty percent of reviews were categorized as “broad” if they addressed multiple intervention types or were not focused on interventions.<sup>2</sup>

<sup>2</sup> Percentages do not add up due to rounding issues.
